# Supplementary material
Source: PubMed Central journal article supplement (PMC2715002)
Supplement: 108.067645_1.pdf [file 108.067645_1.pdf]

Kehoe et al., Supplemental Table 2. Primers used for semi-quantitative RT-PCR.

| Primer name               | Oligonucleotide sequence (5' to 3') |
|---------------------------|-------------------------------------|
| <i>Slc25a31</i> sense     | TGGAGCAACATCCTTGTGTG                |
| <i>Slc25a31</i> antisense | AGAAATGGGGTTTCCTTTGG                |
| <i>Dmc1</i> sense         | AGAATTTTCAAGGCGACACC                |
| <i>Dmc1</i> antisense     | CCACCCCAACAACCTGAG                  |
| <i>E2F6</i> sense         | AAGCTGCAGGCAGAACTCTC                |
| <i>E2F6</i> antisense     | TTCACCCACTCGGGATACTC                |
| <i>Nanog</i> sense        | AGGGTCTGCTACTGAGATGCTCTG            |
| <i>Nanog</i> antisense    | CAACCACTGGTTTTTCTGCCACCG            |
| <i>Pou5f1</i> sense       | TGGAGACTTTGCAGCCTGAG                |
| <i>Pou5f1</i> antisense   | TGAATGCATGGGAGAGCCCA                |
| <i>Rec8L</i> sense        | AGGGCGTCGAAGAACGAG                  |
| <i>Rec8L</i> antisense    | AGCTTCATGTCCTCCCTGAA                |
| <i>RecQ1</i> sense        | ACTGGAATCCGTAGCCAGTG                |
| <i>RecQ1</i> antisense    | AGAGCTGGAAGCATTCAACA                |
| <i>RibC2</i> sense        | CCATGGAGGTAGCGATGTCT                |
| <i>RibC2</i> antisense    | GTGTTCCGCATGTCATTGTC                |
| <i>Smc1b</i> sense        | GCCACGACTTGAAATTCTCC                |
| <i>Smc1b</i> antisense    | GGAGCAGGGATCCAATTCC                 |
| <i>Spo11</i> sense        | GTTGGCCATGGTGAAGAGAG                |
| <i>Spo11</i> antisense    | CTCAAGTTGCCAGCAATCAA                |
| <i>Stag3</i> sense        | GGCTGAAGAAAGGTCACCAC                |
| <i>Stag3</i> antisense    | AGGAACGTGGTTAGCACGAG                |
| <i>Sycp1</i> sense        | ACACCCTCCACACCCTCAC                 |
| <i>Sycp1</i> antisense    | ATCCTCCGACAATTTTGAGC                |
| <i>Tuba3a</i> sense       | GGACCGGATCCGAAAACCTGG               |
| <i>Tuba3a</i> antisense   | GTCTGGAATTCTGTAAAGTCC               |
| <i>Actb</i> sense         | TTCCTTCTTGGGTATGGAAT                |
| <i>Actb</i> antisense     | GAGCAATGATCTTGATCTTC                |
