# Supplementary material
Source: PubMed Central journal article supplement (PMC2715002)
Supplement: 108.067645_2.pdf [file 108.067645_2.pdf]

Kehoe et al., Supplemental Table 1. Primers used ChIP analysis with semi-quantitative PCR.

| Primer name               | Oligonucleotide sequence (5' to 3') |
|---------------------------|-------------------------------------|
| <i>Slc25a31</i> sense     | ACACGTGTTATGGTCACATGC               |
| <i>Slc25a31</i> antisense | GCCTTCTTTGAAGACTGCTTCT              |
| <i>Dmc1</i> sense         | CCACCCCCACAACCTGAG                  |
| <i>Dmc1</i> antisense     | AGAATTTTCAAGGCGACACC                |
| <i>Nanog</i> sense        | TCACACTGACATGAGTGTGG                |
| <i>Nanog</i> antisense    | TCTGTGCAGAGCATCTCAGT                |
| <i>Pou5f1</i> sense       | ACGCAGAGCCAGCACTTCTC                |
| <i>Pou5f1</i> antisense   | CCAGTATTTTCAGCCCATGTCC              |
| <i>Smc1b</i> sense        | GGAGCAGGGATCCAATTCC                 |
| <i>Smc1b</i> antisense    | GCCACGACTTGAAATTCTCC                |
| <i>Spo11</i> sense        | AGCTTCATGTCCTCCCTGAA                |
| <i>Spo11</i> antisense    | AGGGCGTCGAAGAACGAG                  |
| <i>Stag3</i> sense        | AGGAACGTGGTTAGCACGAG                |
| <i>Stag3</i> antisense    | GGCTGAAGAAAGGTCACCAC                |
| <i>Sycp1</i> sense        | ATCCTCCGACAATTTTGAGC                |
| <i>Sycp1</i> antisense    | ACACCCTCCACACCCTCAC                 |
| <i>Tuba3a</i> sense       | TTGTTCCATGCTAAGTTGGATGTC            |
| <i>Tuba3a</i> antisense   | CCGTTCCCTCACCCTGGTCCTCAAC           |
| <i>Actb</i> sense         | AAATGCTGCACTGTGCGGCG                |
| <i>Actb</i> antisense     | AGGCAACTTTCGGAACGGCG                |
